# Supplementary material
Source: PubMed Central journal article supplement (PMC129347)
Supplement: pnas_162359999_10.pdf [file pnas_162359999_10.pdf]

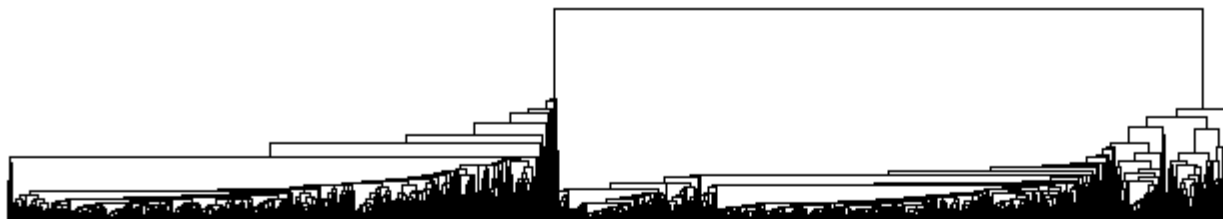

Figure 4

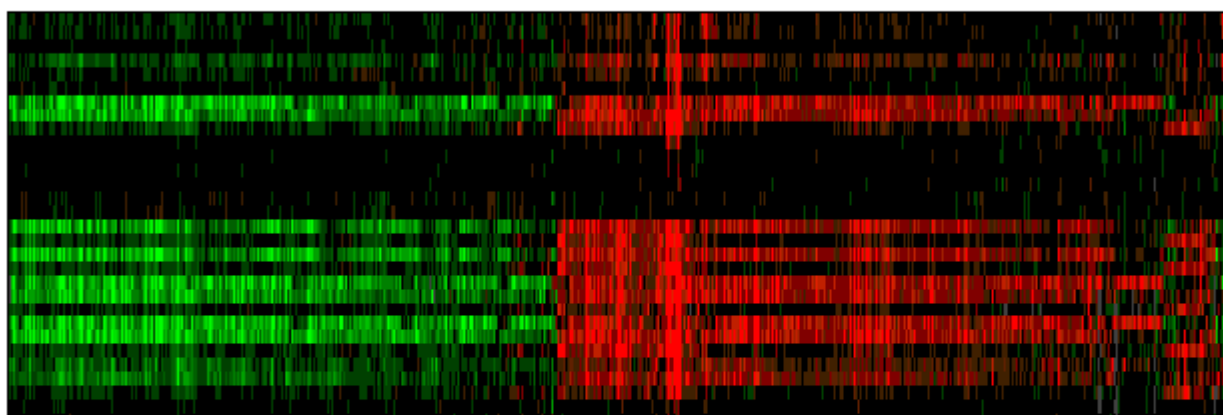

CD4 T cell + CD30/MHC bead, 24 hr  
 CD4 T cell + CD30/MHC bead, 8 hr  
 CD4 T cell + CD30/MHC bead, 2 hr  
 CD4 T cell + CD30/CD28/CTLA-4 bead  
 CD4 T cell + CD30/CD28/CTLA-4 bead  
 CD4 T cell + CD30/CD28/CTLA-4 bead  
 CD4 T cell + CD30/CD28 bead, 24 hr  
 CD4 T cell + CD30/CD28 bead, 8 hr  
 CD4 T cell + CD30/CD28 bead, 2 hr  
 CD4 T cell + CD28 bead, 2 hr  
 CD4 T cell + CD28 bead, 1 hr  
 CD4 T cell + CD28 bead, 2 hr  
 CD4 T cell + MHC bead, 2 hr  
 CD4 T cell + MHC bead, 1 hr  
 CD4 T cell + CD30/CD28 bead, 8 hr  
 CD4 T cell + CD30/CD28 bead, 2 hr  
 CD4 T cell + CD28 bead, 8 hr  
 CD4 T cell + CD28 bead, 2 hr  
 CD4 T cell + CD30/CD28 bead, 24 hr  
 CD4 T cell + CD30/CD28 bead, 8 hr  
 CD4 T cell + CD30/CD28 bead, 2 hr  
 CD4 T cell + CD30/MHC bead, 24 hr  
 CD4 T cell + CD30/MHC bead, 8 hr  
 CD4 T cell + CD30/MHC bead, 2 hr  
 CD4 T cell + CD28 bead, 8 hr  
 CD4 T cell + CD28 bead, 2 hr

Figure 3

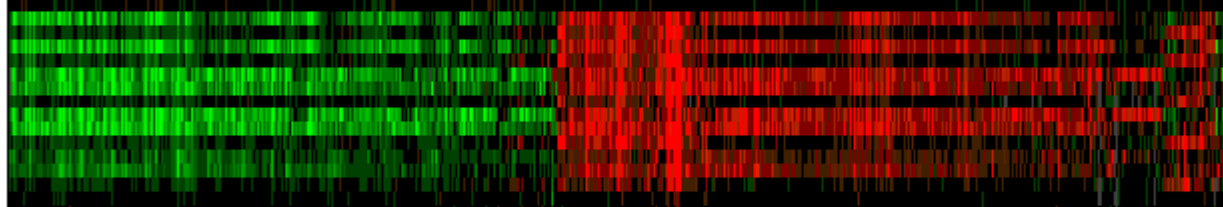

P116 + anti-VES, 2 hr  
 P116 + anti-VES, 2 hr  
 JA45.01(K) + anti-VES, 2 hr  
 Jurkat + anti-VES, 2 hr  
 P116 + zap70 + anti-CD28, 2 hr  
 P116 + anti-CD28, 2 hr  
 JA45.01(K) + anti-CD28, 2 hr  
 Jurkat + anti-CD28, 2 hr  
 Jurkat + anti-furin, 2 hr  
 Jurkat + anti-CD11a, 2 hr  
 Jurkat + anti-CD28, 2 hr  
 Jurkat + anti-CD28, 2 hr  
 Jurkat + anti-VES, 8 hr  
 Jurkat + anti-VES, 4 hr  
 Jurkat + anti-VES, 2 hr  
 Jurkat + anti-VES, 1 hr  
 Jurkat + anti-VES, 0.5 hr  
 Jurkat + anti-VES, 0.25 hr  
 Jurkat + anti-CD28, 8 hr  
 Jurkat + anti-CD28, 6 hr  
 Jurkat + anti-CD28, 4 hr  
 Jurkat + anti-CD28, 2 hr  
 Jurkat + anti-CD28, 1 hr  
 Jurkat + anti-CD28, 0.5 hr  
 Jurkat + anti-CD28, 0.25 hr

Figure 2

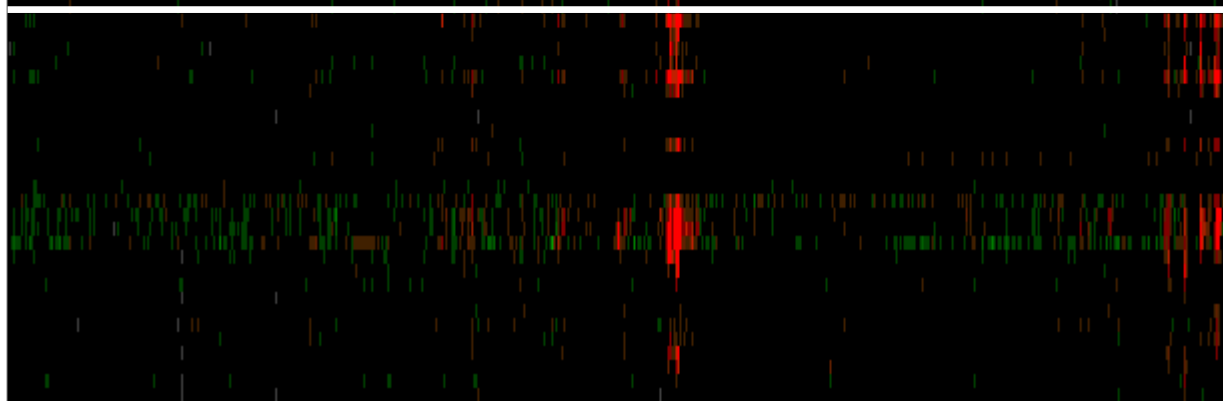

Figure 1

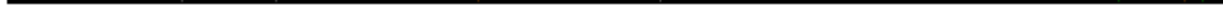

Log<sub>10</sub>(Ratio)  
 1  
 0  
 -1
