# Supplementary material
Source: PubMed Central journal article supplement (PMC129347)
Supplement: pnas_162359999_15.pdf [file pnas_162359999_15.pdf]

**Log<sub>10</sub> Ratio TCR + CD28 +  
CTLA-4\unstimulated**

**Log<sub>10</sub> Ratio TCR + CD28  
\unstimulated**

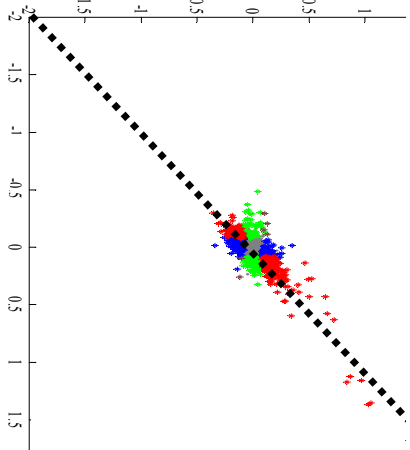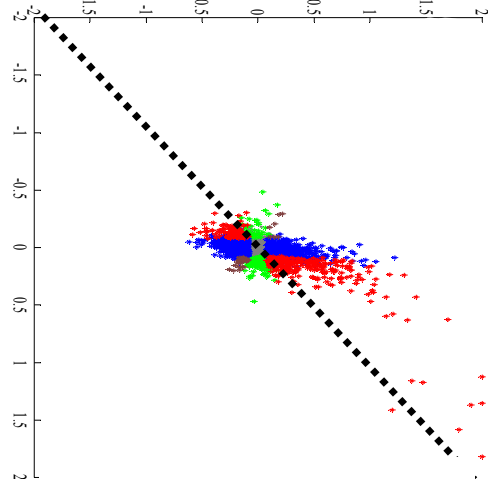

**2 hrs**

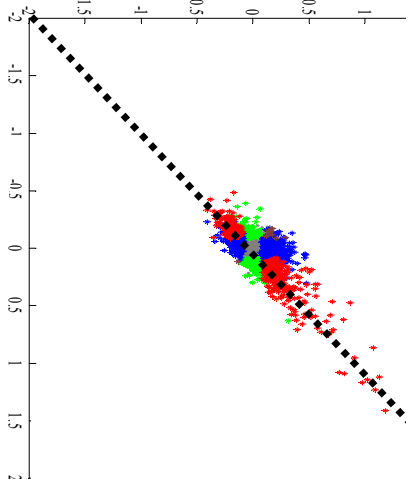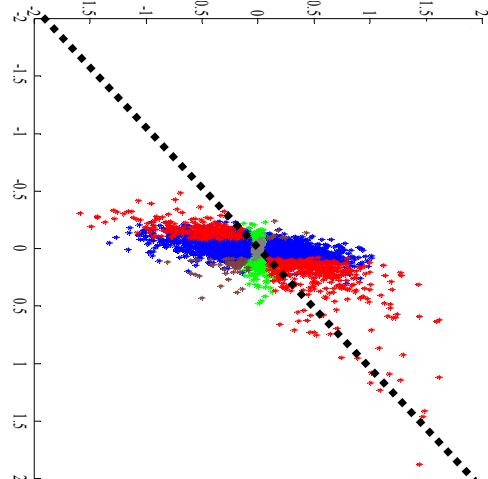

**8 hrs**

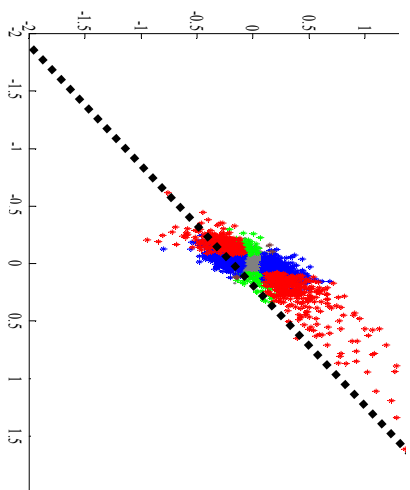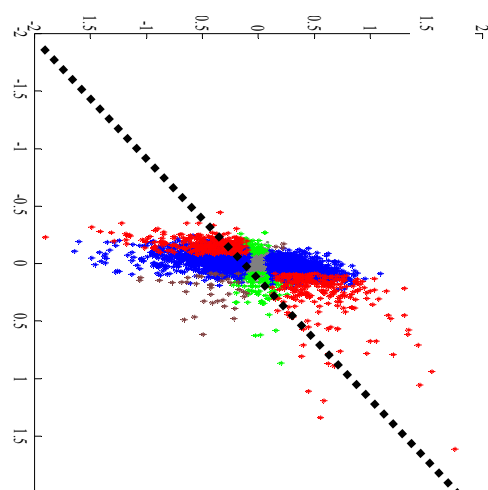

**24 hrs**

**Log<sub>10</sub> Ratio  
TCR/unstimulated**
