# Supplementary material
Source: PubMed Central journal article supplement (PMC129347)

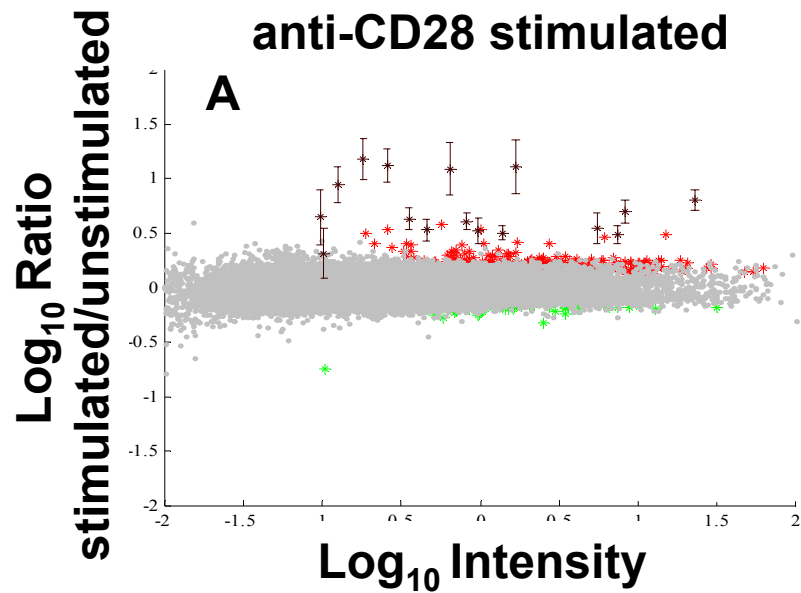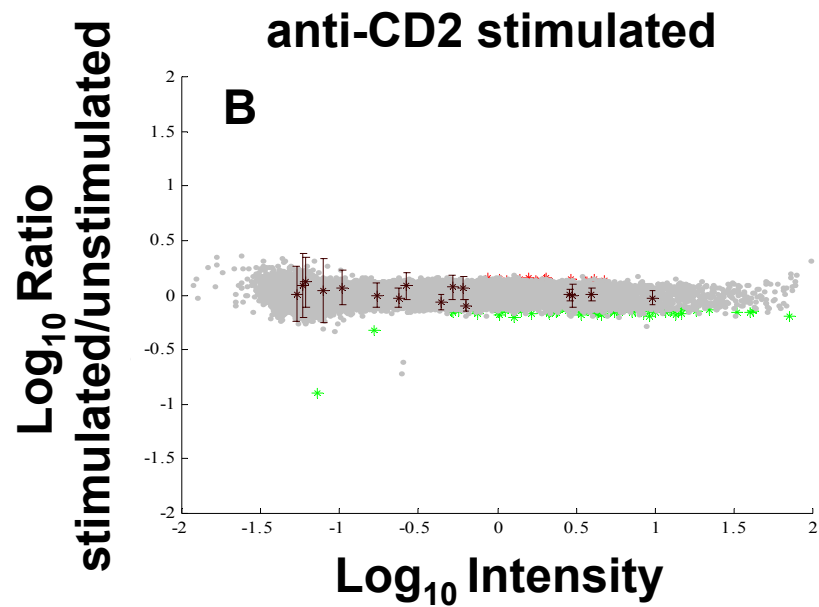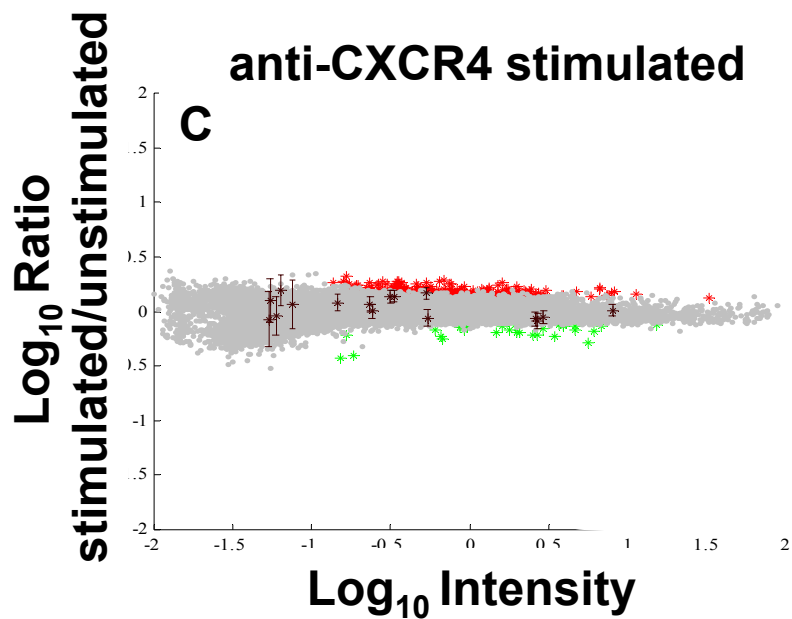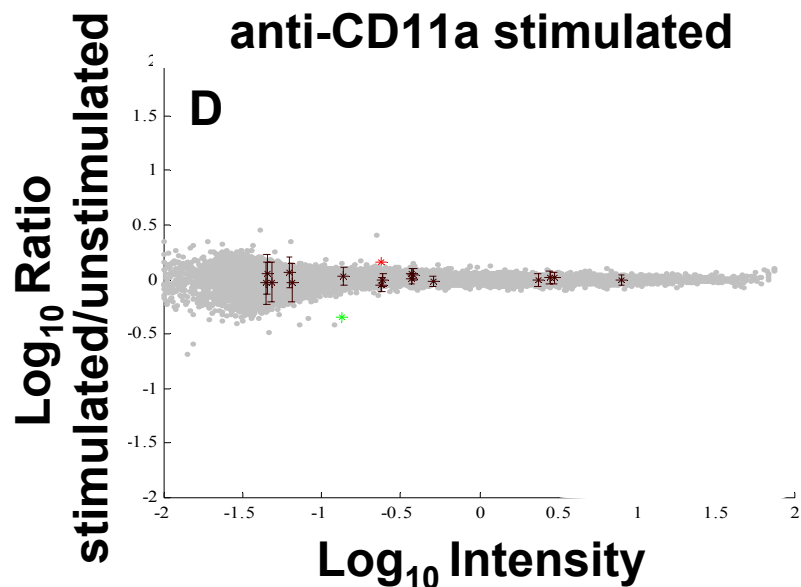

Supplement: pnas_162359999_11.pdf [file pnas_162359999_11.pdf]

A.

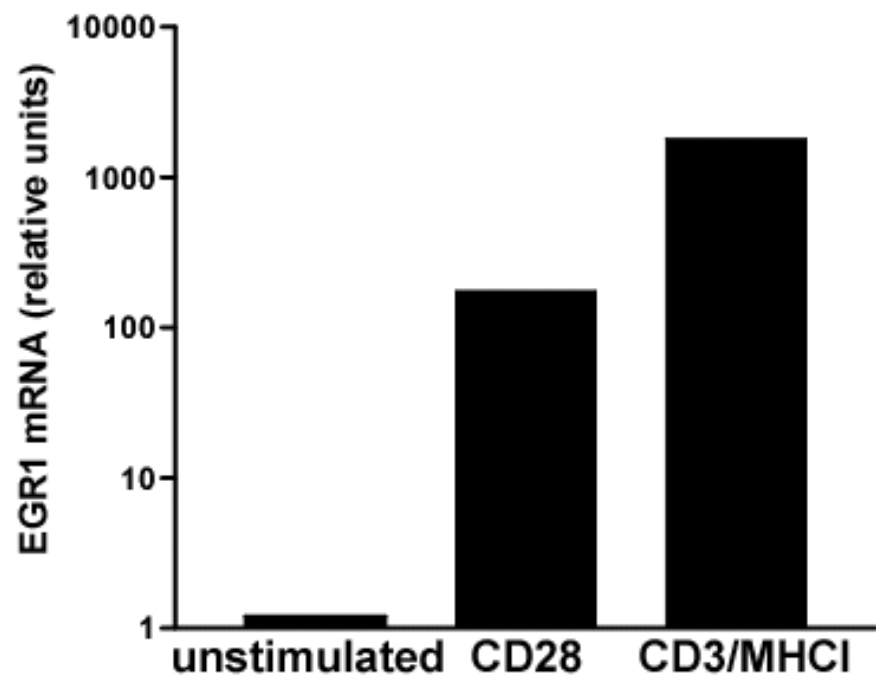

B.

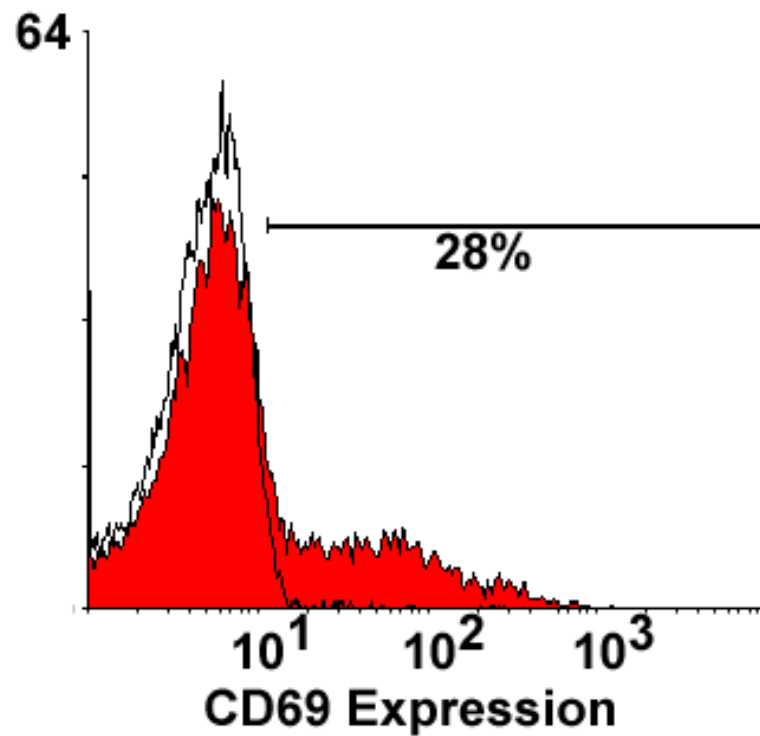

Supplement: pnas_162359999_12.pdf [file pnas_162359999_12.pdf]

# CD3/MHCI beads

# CD3/CD28 beads

Log<sub>10</sub> Ratio treated\untreated

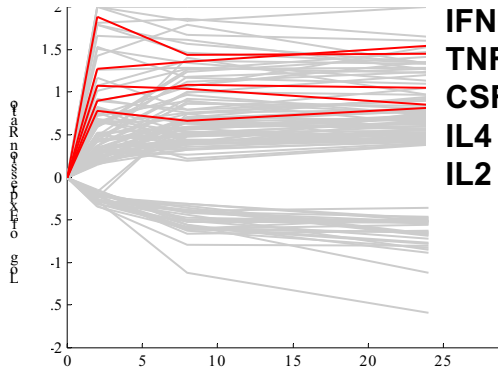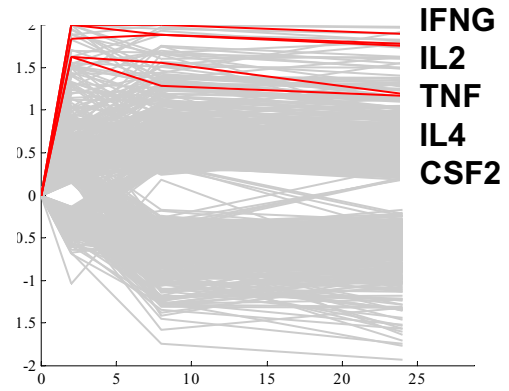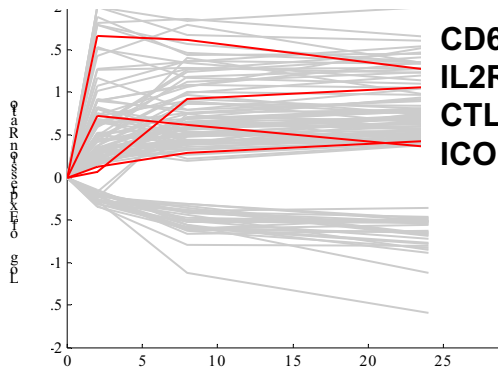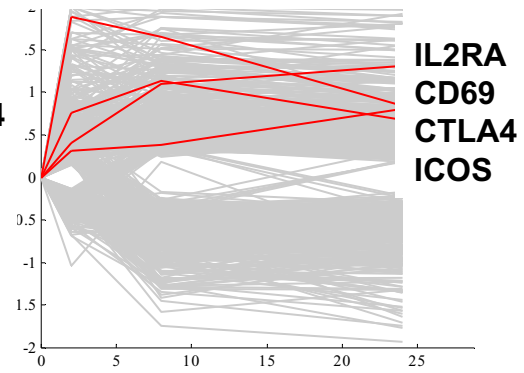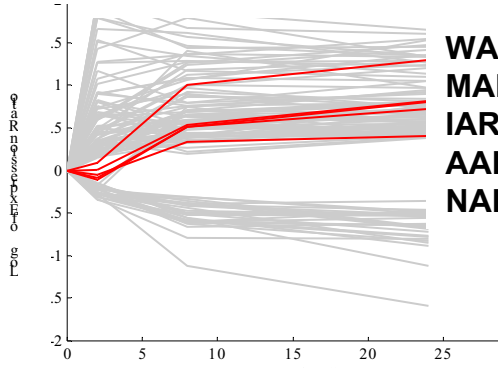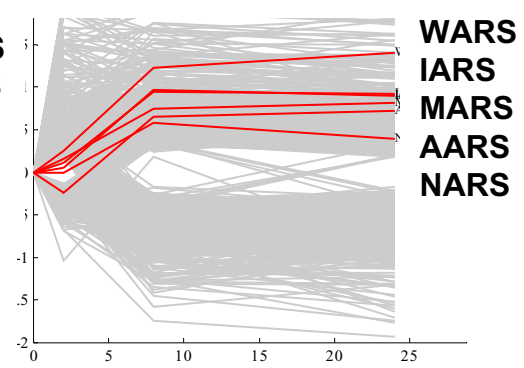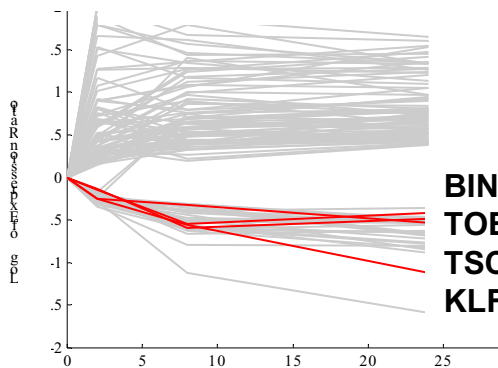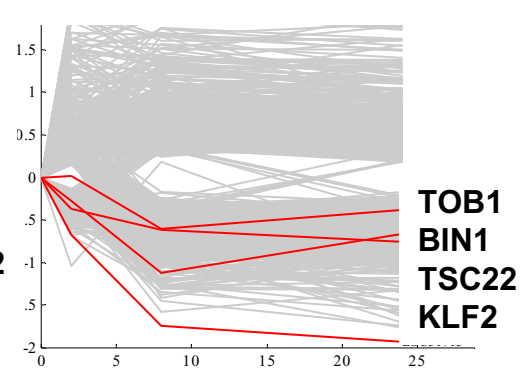

Time (hrs)

Supplement: pnas_162359999_13.pdf [file pnas_162359999_13.pdf]

**A**  
CD3/MHCI stimulation

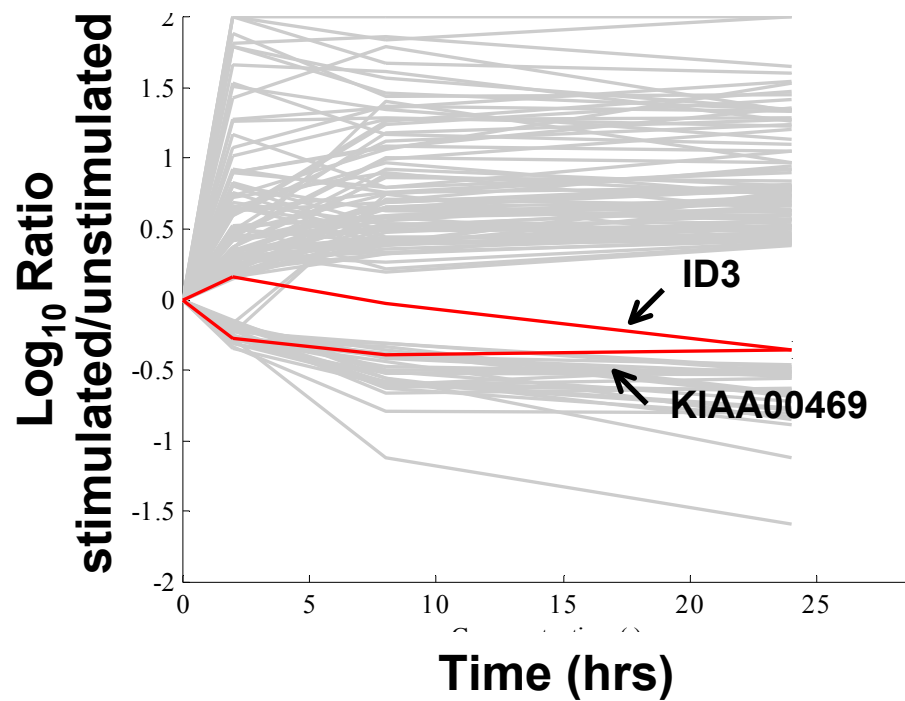

**B**  
CD3/CD28 stimulation

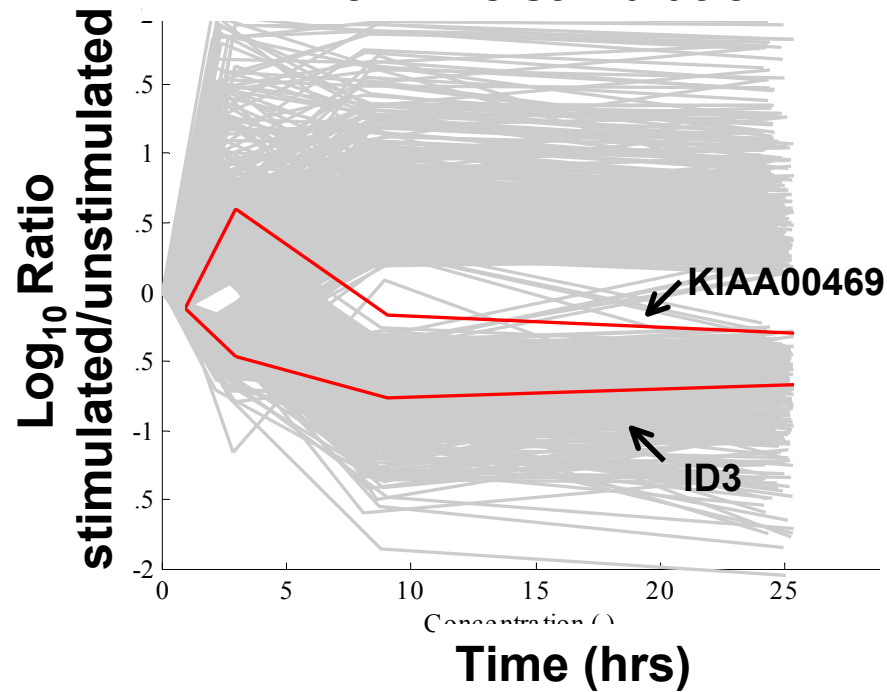

Supplement: pnas_162359999_14.pdf [file pnas_162359999_14.pdf]
